# Supplementary material for: Ocular Delivery of Predatory Bacteria with Cryomicroneedles Against Eye Infection
Source: PubMed Central journal article supplement (PMC8564459; doi:10.1002/advs.202102327), 2021-09-08
Supplement: ADVS-8-2102327-s001.pdf [file ADVS-8-2102327-s001.pdf]

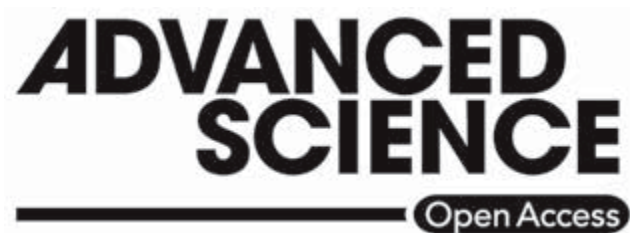

## Supporting Information

for *Adv. Sci.*, DOI: 10.1002/adv.202102327

### **Ocular delivery of predatory bacteria with cryo-microneedles against eye infection**

*Mingyue Cui*<sup>1,2</sup>, *Mengjia Zheng*<sup>1,2</sup>, *Christian Wiraja*<sup>2</sup>, *Sharon Wan Ting Chew*<sup>2</sup>, *Arti Mishra*<sup>3</sup>,  
*Venkatesh Mayandi*<sup>3</sup>, *Rajamani Lakshminarayanan*<sup>3,4,5\*</sup>, *Chenjie Xu*<sup>1\*</sup>

Supporting information

## **Ocular delivery of predatory bacteria with cryo-microneedles against eye infection**

*Mingyue Cui<sup>1,2</sup>, Mengjia Zheng<sup>1,2</sup>, Christian Wiraja<sup>2</sup>, Sharon Wan Ting Chew<sup>2</sup>, Arti Mishra<sup>3</sup>, Venkatesh Mayandi<sup>3</sup>, Rajamani Lakshminarayanan<sup>3,4,5\*</sup>, Chenjie Xu<sup>1\*</sup>*

1 Department of Biomedical Engineering, City University of Hong Kong, 83 Tat Chee Avenue, Kowloon, Hong Kong SAR, China

2 School of Chemical and Biomedical Engineering, Nanyang Technological University, 62 Nanyang Drive, Singapore 637459

3 Ocular Infections & Anti-Microbials Research Group, Singapore Eye Research Institute, The Academia, 20 College Road, Discovery Tower, Singapore 169856

4 Ophthalmology and Visual Sciences Academic Clinical Program, Duke-NUS Graduate Medical School, 8 College Road, Singapore 169857

5 Department of Pharmacy, National University of Singapore, 18 Science Drive, Singapore 117543

\* Correspondence to [chenjie.xu@cityu.edu.hk](mailto:chenjie.xu@cityu.edu.hk); [lakshminarayanan.rajamani@seri.com.sg](mailto:lakshminarayanan.rajamani@seri.com.sg)

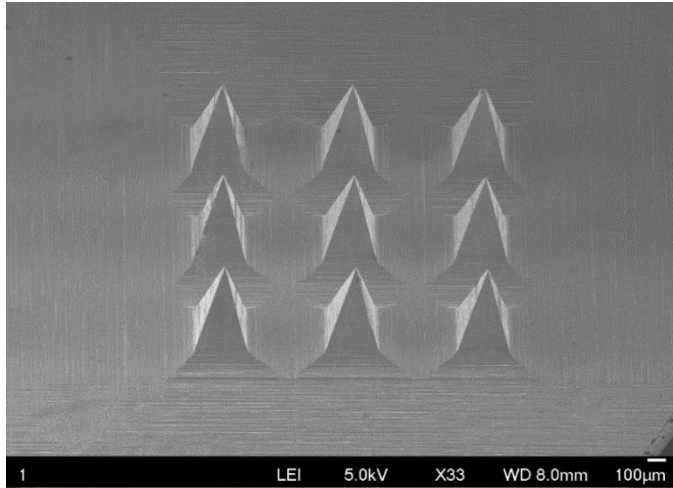

**Figure S1.** Scanning Electron Microscope image of stainless-steel microneedle (MN) mother template (scale bar is 100  $\mu\text{m}$ ).

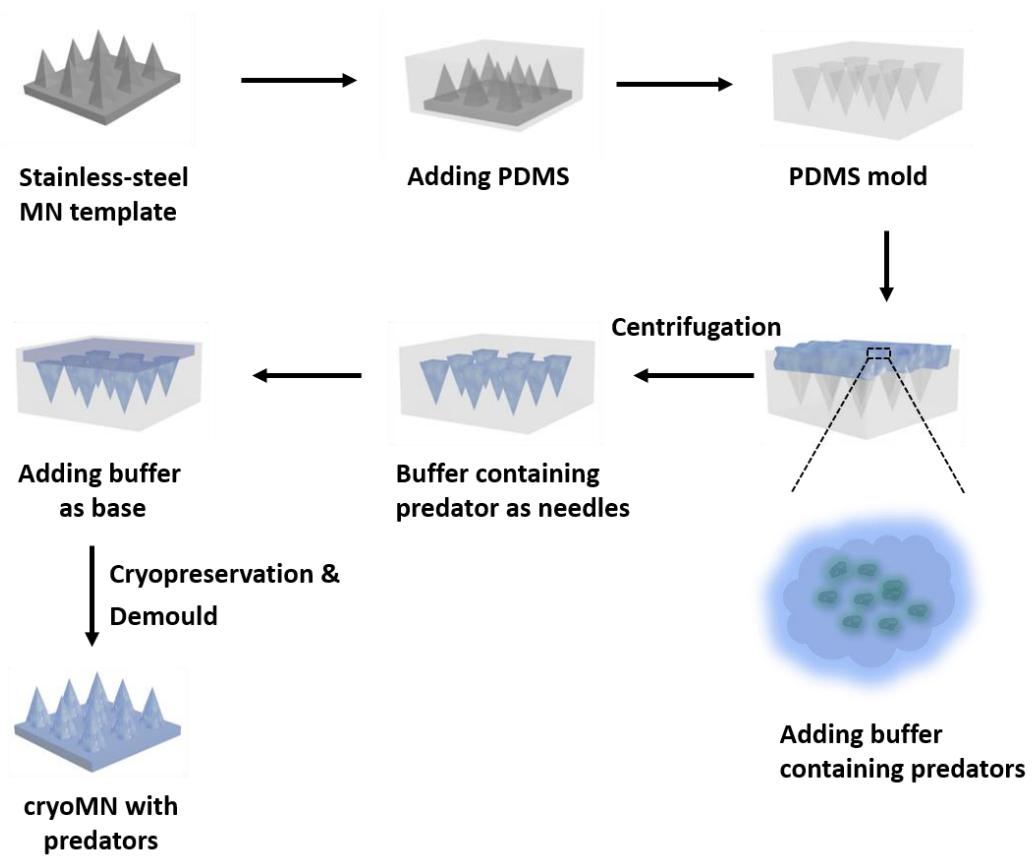

**Figure S2.** Schematic illustration of the cryo-microneedle (cryoMN) fabrication process.

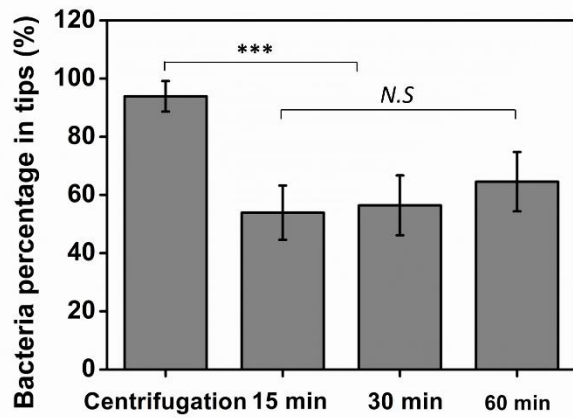

**Figure S3.** Percentage of bacterial inside needle tips by either centrifugation or natural sediment.

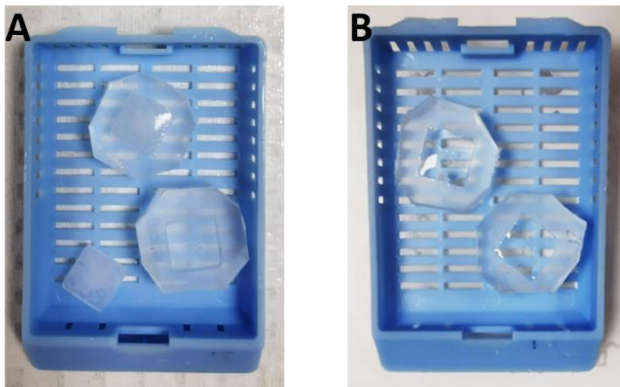

**Figure S4.** cryoMN patches made of cryoprotectant medium containing (A) 5% or (B) 10% glycerol.

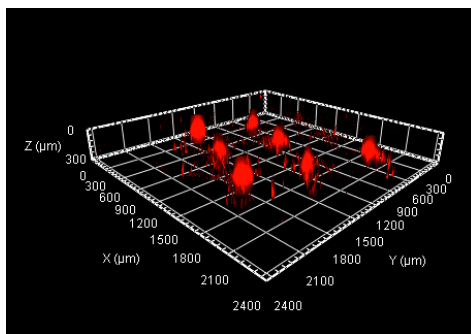

**Figure S5.** Confocal image showing the penetration of cryoMNs and the delivery of bacteria in agarose gel.

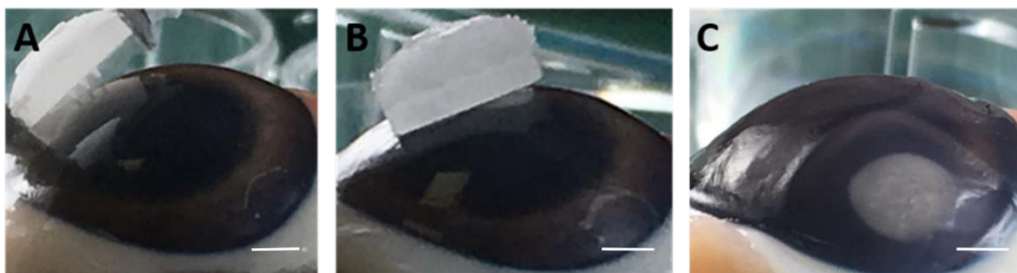

**Figure S6.** Cornea penetration of cryoMNs. A cryoMN patch containing  $3 \times 3$  MNs was thumb pressed on the central region of porcine eye. Bright-field images of the porcine eye before (A) and after (B) cryo-MN insertion. (C) A close view of the MN patterns left on the eye. Scale bar is 2 mm.

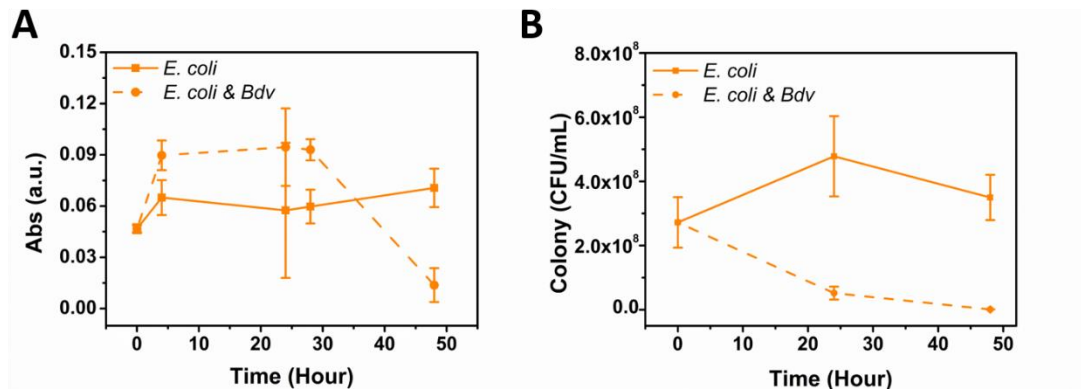

**Figure S7.** *In vitro* predation ability of predatory bacteria. (A) Time-dependent optical density changes after incubation with prey cells measured by BioTek plate reader. (B) Time-dependent changes of bacterial concentrations after incubation with prey cells measured by CFU plating.

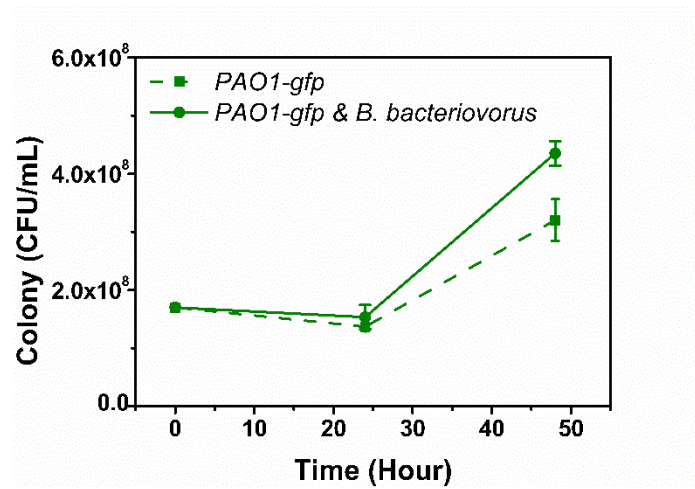

**Figure S8.** *In vitro* predation of *B. bacteriovorus* delivered by cryoMNs against *PAO1-gfp*.
